# Supplementary material for: Multi-elemental analysis of solder using ETV-ICPOES for applications in forensic science
Source: Royal Society of Chemistry journal article supplement (doi:10.1039/d1ja00172h), 2021-01-01
Supplement: d1ja00172h1.pdf [file d1ja00172h1.pdf]

**Supplementary information for**

**Multi-elemental analysis of solder using ETV-ICPOES for applications in forensic science**

by MacConnachie, Moghadam and Beauchemin

---

|      |      |      |      |       |       |       |         |
|------|------|------|------|-------|-------|-------|---------|
| 5 cm | 5 cm | 5 cm | 5 cm | 45 cm | 45 cm | 45 cm | 23.5 cm |
| S1   | S2   | S3   | S4   | S5    | S6    | S7    | S8      |

---

|       |       |       |       |       |       |       |
|-------|-------|-------|-------|-------|-------|-------|
| 45 cm |
| B1    | B2    | B3    | B4    | B5    | B6    | B7    |

**Fig. S1** Sub-sampling of solder wires. EDM-3 (top) spans a total of 178.5 cm; ON-003 (bottom) spans a total of 315 cm.
